# Supplementary material for: Dielectrophoresis of gold nanoparticles conjugated to DNA origami structures
Source: publisher site journal article supplement (doi:10.3762/bjnano.7.87), 2016-07-01
Supplement: Additional file 1 [file 2190-4286-7-87-S1.pdf]

## Supporting Information

for

# Dielectrophoresis of gold nanoparticles conjugated to DNA origami structures

Anja Henning-Knechtel<sup>\*1,2</sup>, Matthew Wiens<sup>1,3</sup>, Mathias Lakatos<sup>1</sup>, Andreas Heerwig<sup>1,4</sup>,  
Frieder Ostermaier<sup>1</sup>, Nora Haufe<sup>1,4</sup> and Michael Mertig<sup>\*1,4</sup>

Address: <sup>1</sup>Physikalische Chemie, Mess- und Sensortechnik, Technische Universität Dresden, 01062 Dresden, Germany; <sup>2</sup>present address: Department of Biology, New York University Abu Dhabi, Abu Dhabi, UAE; <sup>3</sup>Present address: Department of Chemistry, University of Alberta, Edmonton, T6G2G2, Canada and <sup>4</sup>Kurt-Schwabe-Institut für Mess- und Sensortechnik Meinsberg e.V., 04736 Waldheim, Germany

Email: Anja Henning-Knechtel\* - [anja.henning@nyu.edu](mailto:anja.henning@nyu.edu);

Michael Mertig\* - [michael.mertig@tu-dresden.de](mailto:michael.mertig@tu-dresden.de)

\* Corresponding author

## Sequences of staple strands

| Number | Sequence of staples (5 prime to 3 prime)    |
|--------|---------------------------------------------|
| 1      | TGGTCAATAACCTGTCTAAAATATCTTTAGGTGAGGCGGTCA  |
| 2      | GAACGAGTAGATTTCCGTCAATAGATAACATTA AAAATACCG |
| 3      | TGTAGCTCAACATGACGTTATTAATTTTAAAGCGTAAGAATA  |
| 4      | ATTTTTGCGGATGGGGAACAAAGAAACCAAGGGACATTCTGG  |
| 5      | GCTTCAAAGCGAACTTGTTTGGATTATATGGAAATACCTACA  |
| 6      | AGAGGAAGCCCGAAACCATATCAA AATTGAACAATATTACCG |
| 7      | AACGAGAATGACCAACAGTACCTTTTACTTGTAGCAATACTT  |
| 8      | ATATTCATTGAATCGATTGCTTTGAATAGGCCACCGAGTAAA  |
| 9      | GCTTTTGCAAAAAGAAACATCAAGAAAACCAAGAATTGAGTGG |
| 10     | CCCTCGTTTACCAGTGAATTACCTTTTTAGTCAGAGGGTAAT  |
| 11     | GATTTAGGAATACCTAATTTTCCCTTAGTGAAAATAGCAGCC  |
| 12     | AACGGAACAACATTATTAAGACGCTGAGCCCAATCCAATAA   |
| 13     | GAATTACCTTATGCGGTTATAACTATTTTATCCTGAATCT    |
| 14     | AAATTGGGCTTGAGAAGACAAAGAACGCCCTTAAATCAAGAT  |
| 15     | ATATTCATTACCCAACCGTGTGATAAATCAAATCAGATATAG  |
| 16     | GGCTGGCTGACCTTATCATAATTACTAGTTTATTTTCATCGT  |
| 17     | GAGGCGCAGACGGTGCTTAATTGAGAATATCAATAATCGGCT  |
| 18     | GTGTCGAAATCCGCTTTAGGCAGAGGGCAAAAATAATATCCC  |
| 19     | AGCAAAATTAAGCAGCTGCATTAATGAACAACAGCTGATTGC  |
| 20     | GGTTGTACCAAAAAGCGCTCACTGCCCGCAGCAAGCGGTCCA  |
| 21     | AGAAGCCTTTATTTCTGGGGTGCC TAATCTGTTTGATGGTGG |
| 22     | CTCATATATTTTAAAATTCCACACAACATCAA AAGAATAGCC |
| 23     | AGATTCAA AAGGGTATGGTCATAGCTGTTGGAACAAGAGTCC |
| 24     | ATCAATATGATATTGACTCTAGAGGATCAAAGGGCGAAAAAC  |
| 25     | GGAGAGGGTAGCTATGTAAAACGACGGCGAACCATCACCCAA  |
| 26     | GTCATTGCCTGAGACGATTAAGTTGGGTAAAGCACTAAATCG  |
| 27     | CGGTAATCGTAAAATCGCTATTACGCCAGCTTGACGGGGAAA  |
| 28     | TGATAATCAGAAAAAGGCTGCGCAACTGAAGAAAGCGAAAGG  |
| 29     | AAATATTTAAATTGGCTTCTGGTGCCGGGCGGTACAGCTGCG  |
| 30     | ATTAAATTTTTGTTTCGGCCTCAGGAAGGCGCCGCTACAGGG  |
| 31     | ACGCCATCAA AATTCGTAACCGTG CATGTATAACGTGCTTT |
| 32     | CTTTCATCAACATTTTGACCGTAATGGGCATAAGCCCAATAA  |
| 33     | CCGTAACACTGAGTCCAATAGGAACCCAAGCTATCTTACCGA  |
| 34     | GTAGCATTCCACAGCCACCCTCAGAGCCGCCGAACAAAGTTA  |
| 35     | AAAGTTTTGTCGTGCGTTTAGTACCGCCTAACGGAATACCCA  |
| 36     | GTATGGGATTTTGCATATAAGTATAGCCTTACGCAGTATGTT  |
| 37     | TGAGAATAGAAAGGTTTTGCTCAGTACCGTGGCAACATATAA  |
| 38     | TTTTTCACGTTGAAAGAGGCTGAGACTCTTTATTTTGT CACA |
| 39     | GCCTTTAATTGTATTGCCTATTTCCGGAAGCGCCAAAGACAAA |
| 40     | TTTCTTAAACAGCTGTGCCTTGAGTAACGAAGGTAAATATTG  |
| 41     | AACAACCATCGCCCGATGATACAGGAGTTCACCGTCACCGAC  |
| 42     | GGCTTGCAGGGAGTTCTCTGAATTTACCAAATCACCAGTAGC  |
| 43     | CTCAGCAGCGAAAGCAAACAAATAAATCTCACCAATGAAACC  |
| 44     | TACAGAGGCTTTGAACAGGAGGTTGAGGACAGAATCAAGTTT  |

45 TCCATTAACGGGTGAGCCGCCACCAGATCATCGGCATTTTC  
46 CAACCTAAAACGAACCGCCACCCTCAGAATCTTTTCATAATC  
47 AACCTGTCGTGCCAATAAAGCCTCAGAGCATTGGGGCGCGA  
48 ACATTAATTGCGTTCATTATGACCCTGTATACATTTTCGCAA  
49 ATAAAGTGTAAGCCAACGCAAGGATAAATTCCCAATTCTGC  
50 TGTATCCGCTCACATGCAATGCCTGAGCTAAAGTACGGTGT  
51 TCGAATTCGTAATCGAGAAAGGCCGGAGGCTGAATATAATGC  
52 CATGCCTGCAGGTCCAACCGTTCTAGCTTTTGATAAGAGGTC  
53 CCCAGTCACGACGTTTTTTGAGAGATCTACTCCAACAGGTCA  
54 GATGTGCTGCAAGGGTCTGGAGCAAACAGCGTTTTAATTCGA  
55 CGGTGCGGGCCTCTCTAGCATGTCAATCCATCAAAAAGATTA  
56 GCCATTCGCCATTCGCCCAAAAACAGGGGTCTTTACCCTGA  
57 AGCTTTCCGGCACCTAAACGTTAATATTTAAACAGTTCAGAA  
58 GGACGACGACAGTAAAATCAGCTCATTTCCGAATCGTCATAA  
59 TGATAGATGGGCGCAAATTCGCGTCTGGCGGGTAATAGTAAA  
60 GAACAAACGGCGGAAAATGTGAGCGAGTCAAATAGCGAGAG  
61 CAGGGATAGCAAGCTTCGTCACCAGTACCAACACTATCATAA  
62 CACCCTCAGAACCGACAGCCCTCATAGTCAGATACATAACGC  
63 CACCGTACTCAGGATTTCCAGACGTTAGGATTCATCAGTTGA  
64 CGTCGAGAGGGTTGTAACAACCTTTCAATAATAAACGAACT  
65 TAGGATTAGCGGGGAACAACCTAAAGGAAGCTCATTATACCAG  
66 ACATGAAAGTATTAATCTCCAAAAAAACTTTAATCATTGT  
67 CAGTTAATGCCCCCGGTTTATCAGCTTCCAGAACGAGTAGT  
68 TTTTAACGGGGTCATGATACCGATAGTTAGCTGCTCATTAG  
69 CATAATGGCTTTTACGCATAACCGATATTGACAAGAACCGG  
70 AATGGAAAGCGCAGTAAAGGCCGCTTTTAGACCAGGCGCATA  
71 GGCTTGATATTCAACAGCATCGGAACGCCGAACTGACCAAC  
72 CGCCGCCAGCATTGGGACTAAAGACTTTTACTTAGCCGGAAC  
73 AGCCACCACCCTCAAAAATACGTAATGCTCGCCTGATAAATT  
74 CCTTCACCGCCTGGTGCAACAGTGCCACAACAGTTGAAAGGA  
75 CGCTGGTTTGCCCCAGAAGATAAACAGAGGAGCACTAACAA  
76 TTCCGAAATCGGCACCCTAAAACATCGCTACATTTGAGGATT  
77 CGAGATAGGGTTGATATTTTTGAATGGCGACAACCTCGTATTA  
78 ACTATTAAGAACGACCCTTCTGACCTGAAAAGTTTGAGTAA  
79 CGTCTATCAGGGCGACGACCAGTAATAAACAGAAAGGAGCGG  
80 ATCAAGTTTTTTGGCGTCTGAAATGGATTGATGGCAATTCAT  
81 GAACCCTAAAGGGAAGGAAAAACGCTCACTTCTGAATAATGG  
82 GCCGGCGAACGTGGGCTGGTAATATCCAATTTGCACGTAAAA  
83 AGCGGGCGCTAGGGAACATCACTTGCCTAGGTTTAACGTCAG  
84 CGTAACCACCACACGCAAATTAACCGATCGGGAGAAACAA  
85 CGCGTACTATGGTTTTTATAATCAGTGACCAAGTTACAAAAT  
86 CCTCGTTAGAATCAGATTTTAGACAGGATACCTGAGCAAAAAG  
87 TAAGAGCAAGAAACAGAGAGATAACCCAAAAATTAATTACAT  
88 AGCCCTTTTTAAGAAACACCCTGAACAATAATGGAAACAGTA  
89 CCAGAAGGAAACCGAACATAAAAACAGGCTTGCTTCTGTAAA

90 AAAGAACTGGCATGTTTAAACGTCAAAAAAATCCTTGAAAACA  
91 AGCAAACGTAGAAAGCCATATTATTTATAAGAGTCAATAGTG  
92 AAGAAACGCAAAGAAGCGTCTTTCCAGACTACCTTTTTAACC  
93 ATCAATAGAAAATTCACCCAGCTACAATATGTAAATGCTGAT  
94 AGGGCGACATTCAAGGGAGGTTTTGAAGGAGAAAACCTTTTTTC  
95 ACGGAAATTATTCAATTCTAAGAACGCGGACCTAAATTTAAT  
96 TTGAGCCATTTGGGCGCCCAATAGCAAGAAGGCGTTAAATAA  
97 ACCATTACCATTAGACAAGCAAGCCGTTAAAAAGCCTGTTTA  
98 ATCGATAGCAGCACTTCCAAGAACGGGTCAGTATAAAGCCAA  
99 GCCTTTAGCGTCAGGCATGTAGAAACCACGCCATATTTAACA  
100 GGTACATAGCCCCCTAAGTCCTGAACAAGTTTTTCGAGCCAGTA  
101 GCAAATGAAAAATCACCAGTGAGACGGGTCGGCCAACGCGCG  
102 GTATTAACACCGCCCCCTGAGAGAGTTGCTTTCCAGTCGGGA  
103 AACGAACCACCAGCAGCAGGCGAAAATCGAGTGAGCTAACTC  
104 GCGCGAACTGATAGAAATCCCTTATAAATACGAGCCGGAAGC  
105 CGTGGCACAGACAAGTGTTGTTCCAGTTTTCTGTGTGAAAT  
106 CCAACAGAGATAGATGGACTCCAACGTCCCCGGGTACCGAGC  
107 GATTCACCAGTCACATGGCCACTACGTCAGTGCCAAGCTTG  
108 TTTTGACGCTCAATGGTCGAGGTGCCGTAACGCCAGGGTTTT  
109 CCAGCCATTGCAACGCCCCCGATTTAGAGCTGGCGAAAGGGG  
110 AAACATCGGCCTTCGAGAAAGGAAGGGTTGGGAAGGGCGAT  
111 CTTTGATTAGTAATCGCTGGCAAGTGTAACCAGGCCAAAGC  
112 AGAGTCTGTCCATCCCGCCGCGCTTAATATCGCACTCCAGCC  
113 TCCTGAGAAGTGTTGCTTTGACGAGCACCTGCCAGTTTGAGG  
114 AGGCCGATTAAAGGGAGCGGGAGCTAAAATAGGTCACGTTGG  
115 TGAGCGCTAATATCAATGAAATAGCAATTGGATTCTCCGTGG  
116 GGGAGAATTAACGAAAGTAAGCAGATAACCACCCTCATTTT  
117 TTTACAGAGAGAATAGGAAACGCAATAAACCCCTCAGAACCGC  
118 GAAACGATTTTTTGATTAAGACTCCTTACGGAATAGGTGTAT  
119 TTACAAAATAACAATACATACATAAAGAGGCGGATAAGTGC  
120 TACCAACGCTAACGCACCACGGAATAAGCTCAAGAGAAGGAT  
121 TAGTTGCTATTTTGCATATGGTTTACCACCTATTATTCTGAA  
122 ACCTCCCGACTTGCCCGATTGAGGGAGGAGTGCCCGTATAAA  
123 AAGGCTTATCCGGTTTAAAGGTGAATTAGTACTGGTAATAAG  
124 AGGAATCATTACCGAATTAGAGCCAGCAGTTCCAGTAAGCGT  
125 CGCACTCATCGAGACAAGGCCGAAACGCTCATTAAAGCCAG  
126 GTCTTTCCCTTATCACGTAATCAGTAGCGCAGGTCAGACGATT  
127 ATCCTAATTTACGAACTGTAGCGCGTTTACCACCACCAGAGC  
128 TATCAACAATAGATTATTAGCGTTTGCCACCGCCACCCTCAG  
129 CAATCAATATCTGGATCAATTCTACTAACAAGGCAAAGAATT  
130 ATTGAGGAAGGTTATTTAGCTATATTTTCATAAAGCTAAATC  
131 CTAATAGATTAGAGAGTTTGACCATTAGAATACTTTTGCGGG  
132 TAGAAGTATTAGACCCATATAACAGTTGAAATTTTGAACC  
133 AATCCTTTGCCCGATTTTAAATATGCAATAATGTGTAGGTAA  
134 CATTATCATTTTGCCTTAGAGCTTAATTACAGTCAAATCACC

135 AATTATCATCATATCTTTAATTGCTCCTGATAAATTAATGCC  
136 CAATATAATCCTGACAGACCGGAAGCAAACAAAGGCTATCAG  
137 AAGGGTTAGAACCTAGACTTCAAATATCAGAGAATCGATGAA  
138 CAGAAATAAAGAAAAGCAAAGCGGATTGATATGTACCCCGGT  
139 ATGAATATACAGTATAAATCAAAAATCAAAGATTGTATAAGC  
140 TAACGGATTTCGCCTCCCCTCAAATGCTTTTGTAAAATTCGC  
141 CGCGCAGAGGCGAAAGCGTCCAATACTGTTTAAACCAATAGGA  
142 AAGATGATGAAACAAGTTTTGCCAGAGGCTTCCTGTAGCCAG  
143 TTAACAATTTTATTACGACGATAAAAACAACAACCCGTCGTA  
144 CATAAATCAATATAAGGCATAGTAAGAGAACTACAACGCCT  
145 TCGTCGCTATTAATACATTCAACTAATGTAGCGTAACGATCT  
146 TAGCGATAGCTTAGATTACAGGTAGAAATAAATGAATTTTCT  
147 AATTTATCAAATCAGAAAATCTACGTCAGTTTCAGCGGAG  
148 TCCGGCTTAGGTTGGATTTTAAGAAGTGTGCGAATAATAAT  
149 GCAAATCCAATCGCATGGTTTAAATTTCAAGGCTCCAAAAGGA  
150 AAATATATTTTAGTCCTGACGAGAAACAGCTTTCGAGGTGAA  
151 GGTTTGAATACCGAATCAACGTAACAAGCGCCGACAATGAC  
152 GAATAAACACCGGACATCAAGAGTAATCTATTCGGTCGCTGA  
153 GTATCATATGCGTTGATGAACGGTGTACGCGGGATCGTCACC  
154 CGCTCAACAGTAGGCAATCATAAGGGAAAGGGTAGCAACGGC  
155 ACGCCAACATGTAAGACCTGCTCCATGTTTCATGAGGAAGTT  
156 ATAAGAGAATATAAGGAGATTTGTATCACACTACGAAGGCAC  
157 CAATAAATCATAACAGGTAGTAGTAGCATTATC  
158 GGGAGAGGCGGTTTTGCGTATTGG  
159 GCGCCAGGGTGGTTTTTCTTTTCTAAAGCATCACCTTGCTGA  
160 ACCTCAAATATCAAACCT  
161 CTTTGACCCCCAGCGAACACTAAAACACTCAT  
162 AGAGGCAAAAGAATTTATACCAAGCGCG  
163 CACCGGAACCGCCTCCCTCAGAG  
164 AAAATCACCGGAACTGTTTCAGCTAATGC  
165 CAATAAACAAACACAGAGCCAC  
166 GTAAAGTAATTCTGTCCAGACGACGA  
167 AAAAAAAAAAAAAAAAAAAAAACAAAGTACAACAGTACCG  
168 AAAAAAAAAAAAAAAAAAAAAACAAAAGAGAACGCGCCTGTT  
169 AAAAAAAAAAAAAAAAAAAAAACAATTCTATTAGTCTTTAAT  
170 AAAAAAAAAAAAAAAAAAAAAATCTTCTAGGCGTTTTAGCGA  
171 AAAAAAAAAAAAAAAAAAAAAACAAAAGGAATTACGTGTGAGT  
172 AAAAAAAAAAAAAAAAAAAAAACTATTATAGTCAGATTGCGTA  
173 AAAAAAAAAAAAAAAAAAAAAACTGGAAGTTTCATTTTTACAA  
174 AAAAAAAAAAAAAAAAAAAAAAGAATAACGAAGCGCATTAGAC  
175 AAAAAAAAAAAAAAAAAAAAAAGATTTTCGAGTAGAAGAACTC  
176 AAAAAAAAAAAAAAAAAAAAAAGCAAATCGCTGAGAGCCAGCA  
177 AAAAAAAAAAAAAAAAAAAAAAGCTGAAAAGGTGGCTCAGTTG  
178 AAAAAAAAAAAAAAAAAAAAAAGGATTAGAGAGTACTCCTGAT  
179 AAAAAAAAAAAAAAAAAAAAAATATCAGATATTTACATTGGCA

180 AAAAAAAAAAAAAAAAAAATCAGGACGTTGGGAATAGGTC  
181 AAAAAAAAAAAAAAAAAAATGAATAAGGCTTGCTAATTC  
182 AAAAAAAAAAAAAAAAAAATGAGAGAGCCTAATTTGCCAG  
183 AAAAAAAAAAAAAAAAAAATGTTTAGACTGGATTTATTCA  
184 AAAAAAAAAAAAAAAAAAATTCTTACATTAACCAAGTAC  
185 AAAAAAAAAAAAAAAAAAATTTCAATACGGTACGCCAGAA  
186 AAAAAAAAAAAAAAAAAAATTTGAAAGAGGACAATACAAA
